# Supplementary material for: Circulating tumor-derived mutant mitochondrial DNA: a predictive biomarker of clinical prognosis in human squamous cell carcinoma
Source: PubMed Central journal article supplement (PMC3443250; doi:10.18632/oncotarget.523), 2012-07-25
Supplement: oncotarget-03-670-s002.pdf [file oncotarget-03-670-s002.pdf]

## Circulating tumor-derived mutant mitochondrial DNA: a predictive biomarker of clinical prognosis in human squamous cell carcinoma - Katsuhiro Uzawa et al

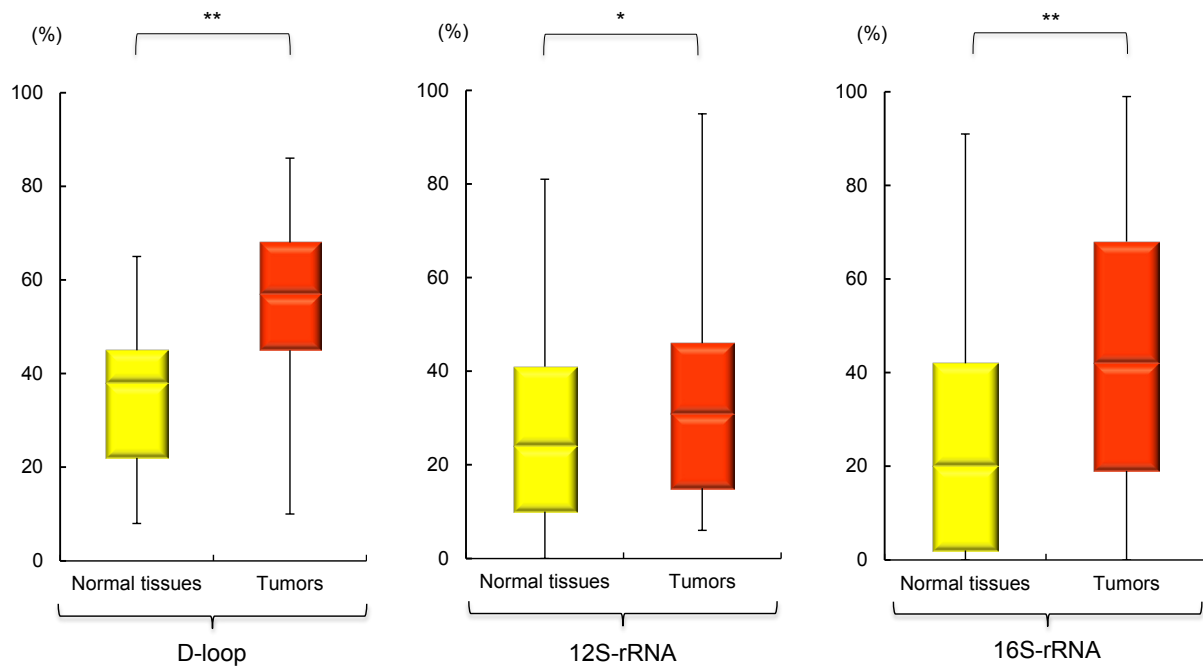

**Supplementary Figure 1: Comparison of mutant mtDNA levels between tumors (red boxes) and corresponding normal tissues (yellow boxes).** The statistical significance of the data was determined using the Mann-Whitney  $U$  test.  $P < 0.05$  was considered significant. The data are expressed as the mean  $\pm$  standard error of the mean. The horizontal indentations in the colored boxes indicate the medians. \* $P < 0.05$ , \*\* $P < 0.01$  compared with normal tissues. All experiments were performed in triplicate.

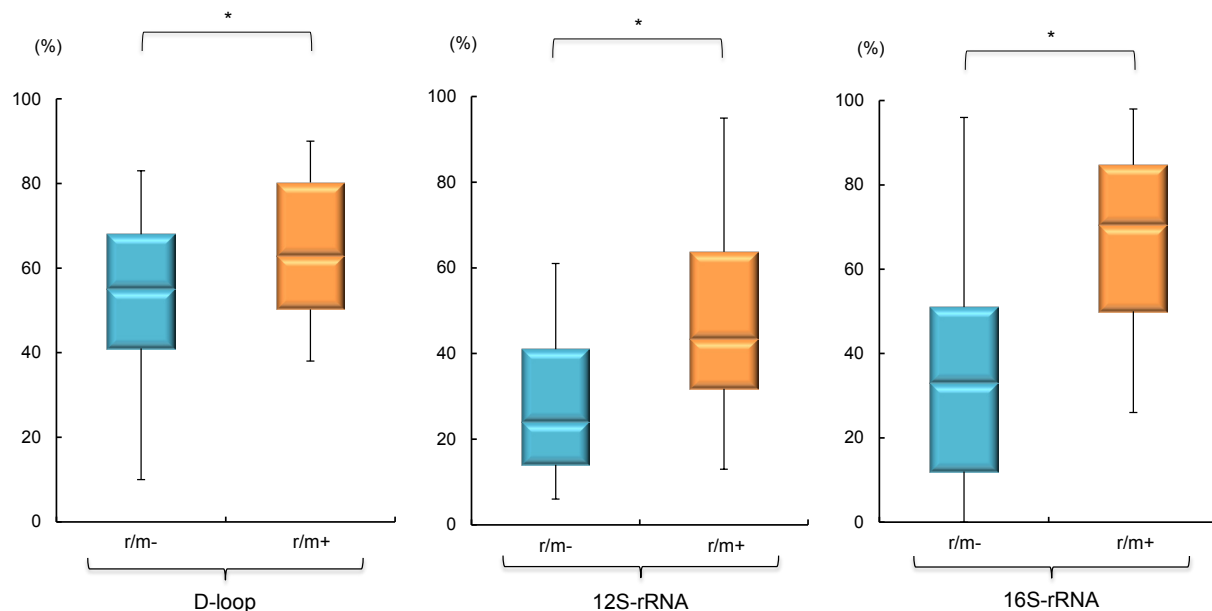

**Supplementary Figure 2: Comparison of the levels of mutant mtDNAs in the tumors obtained from r/m- and r/m+ patients.** The blue boxes indicate the r/m- groups; the orange boxes indicate the r/m+ groups. The statistical significance of the data was determined using the Mann-Whitney  $U$  test.  $P < 0.05$  was considered significant. The data are expressed as the mean  $\pm$  standard error of the mean. The horizontal indentations in the colored boxes indicate the medians. \* $P < 0.05$  compared with the r/m- group. All experiments were performed in triplicate.
